# Supplementary material for: Interlaced NiCoO 2 nanoparticle/nanosheet films for electrochromic energy storage devices with wide-band optical modulation and robust stability
Source: Royal Society of Chemistry journal article supplement (doi:10.1039/d4tc02789b), 2024-10-31
Supplement: d4tc02789b1.pdf [file d4tc02789b1.pdf]

## Supporting Information

# Interlaced NiCoO<sub>2</sub> nanoparticle/nanosheet films for electrochromic energy storage devices with wide-band optical modulation and robust stability

Yongchao Liu,<sup>‡</sup> Yu Zhong,<sup>‡</sup> Huanhuan Liu, Pengyang Lei, Shiyong Liu, Jinhui Wang\* and Guofa Cai\*

*Key Laboratory for Special Functional Materials of Ministry of Education, National & Local Joint Engineering Research Center for High-efficiency Display and Lighting Technology, School of Nanoscience and Materials Engineering, Henan University, Kaifeng 475004,*

*\* Corresponding author: [jinhui.wang@henu.edu.cn](mailto:jinhui.wang@henu.edu.cn) (Jinhui Wang); [caiguofa@henu.edu.cn](mailto:caiguofa@henu.edu.cn) (Guofa Cai).*

*‡ Yongchao Liu and Yu Zhong contributed equally to this work.*

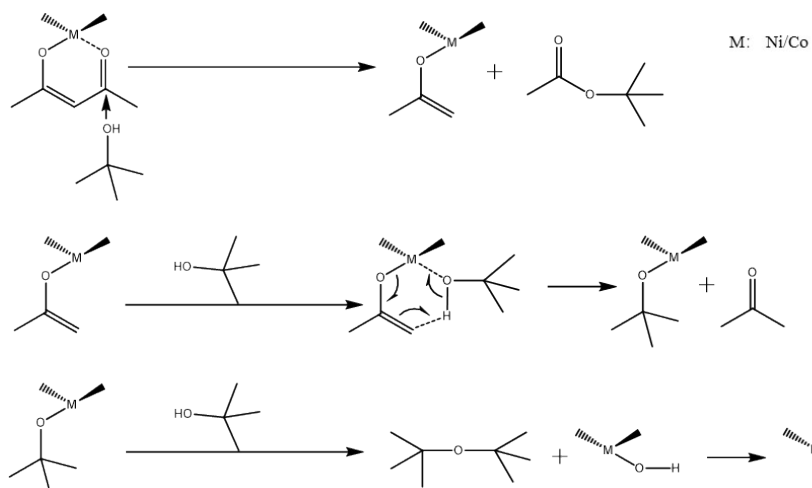

**Fig. S1** Schematic diagram of the reaction process of NiCoO<sub>2</sub> using the solvothermal method.

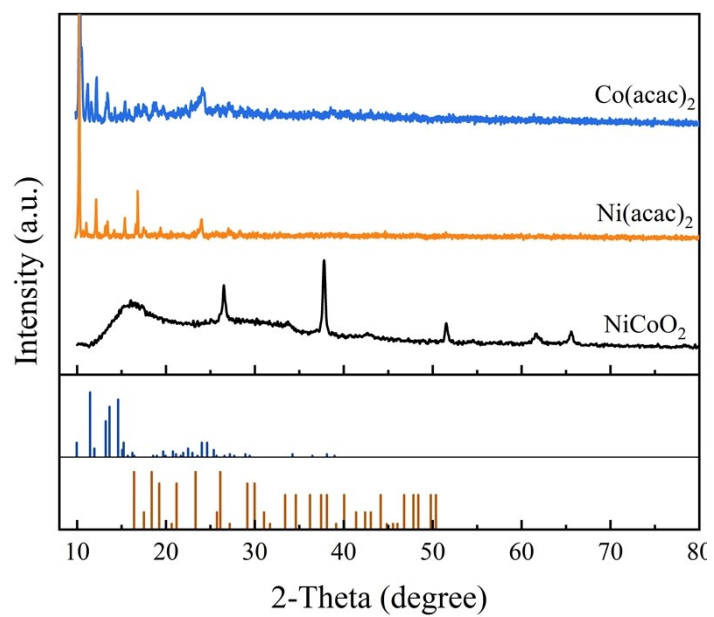

**Fig. S2** XRD diffraction of  $\text{Ni}(\text{acac})_2$  and  $\text{Co}(\text{acac})_2$ .

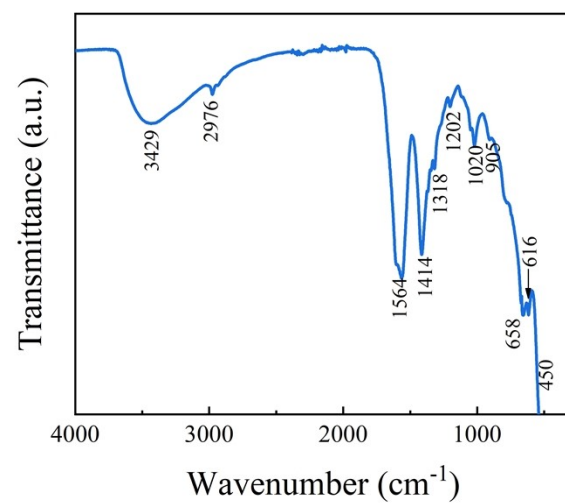

**Fig. S3** FTIR spectra of the NiCoO<sub>2</sub> precipitate at the wavenumber of 400 to 4000 cm<sup>-1</sup>.

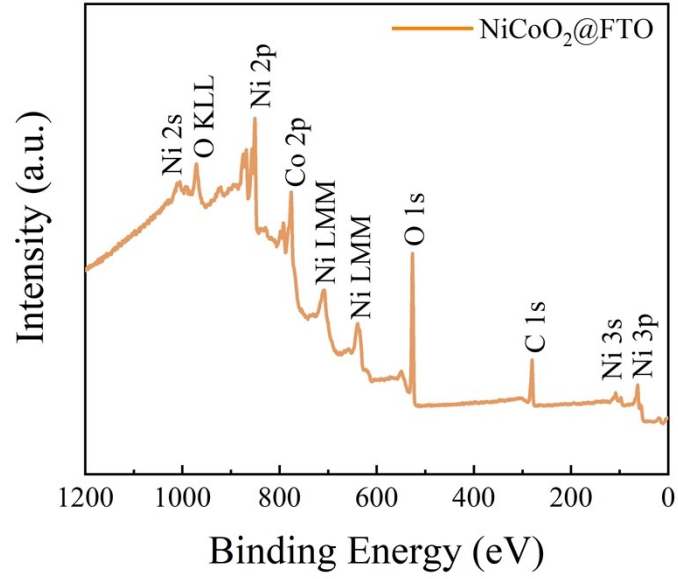

**Fig. S4** The XPS full spectrum of the NiCoO<sub>2</sub> thin film grown on FTO substrates.

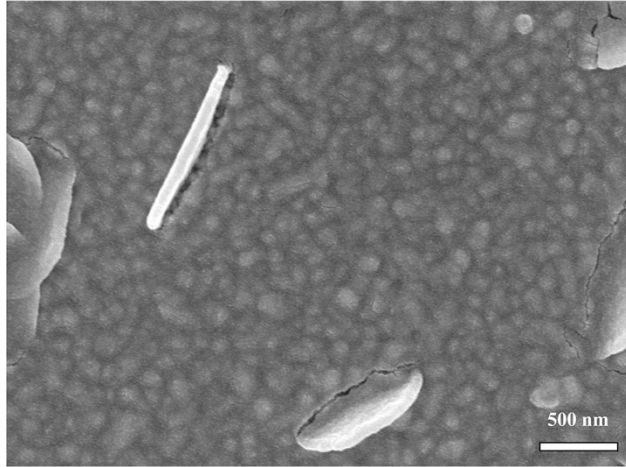

**Fig. S5** SEM image of the NiCoO<sub>2</sub> thin film.

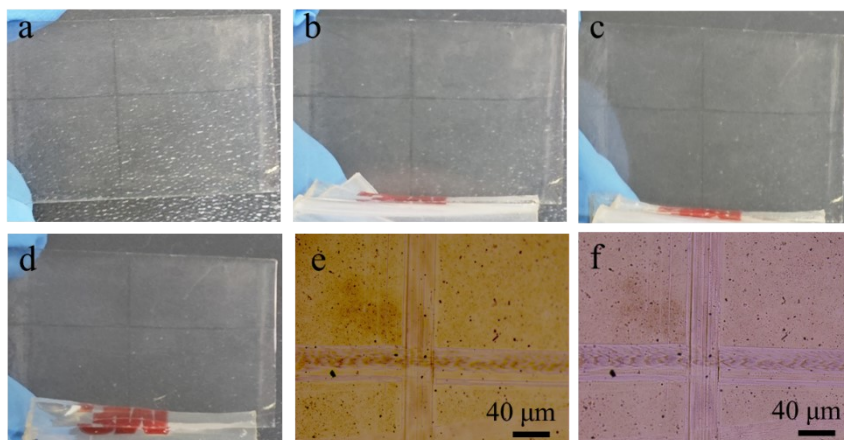

**Fig. S6** Tape peeling test of the NiCoO<sub>2</sub> thin film: Digital photos of the film without peeling (a), peeling once (b), peeling twice (c), and peeling thrice (d), respectively; Optical microscope images of the NiCoO<sub>2</sub> thin film before (e) and after (f) tape peeling thrice.

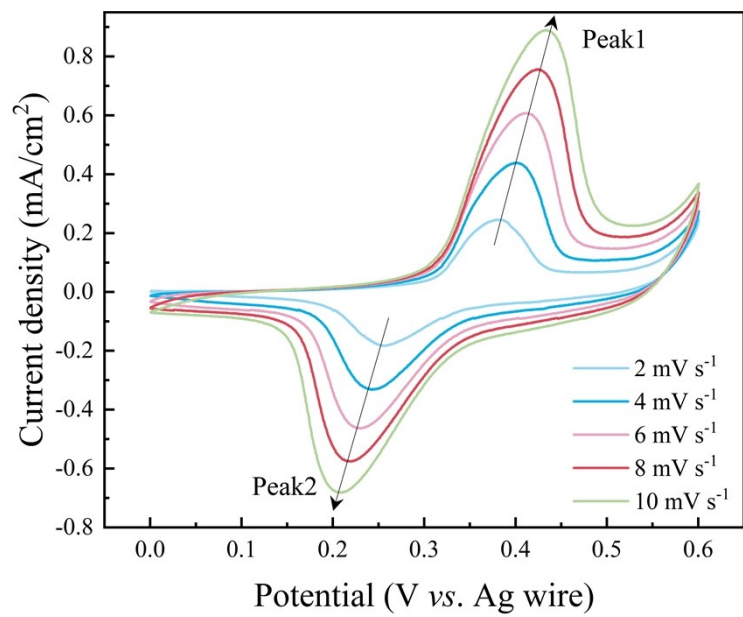

**Fig. S7** CV curves of film at different scan rates from 2 to 10 mV s<sup>-1</sup>.



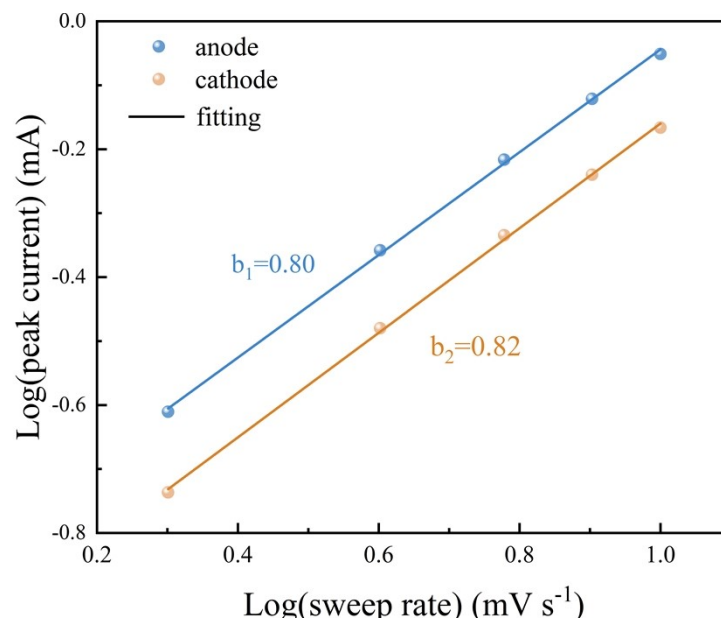

**Fig. S8** Calculation of b value according to the relationship between  $\log(v)$  and  $\log(i)$ .

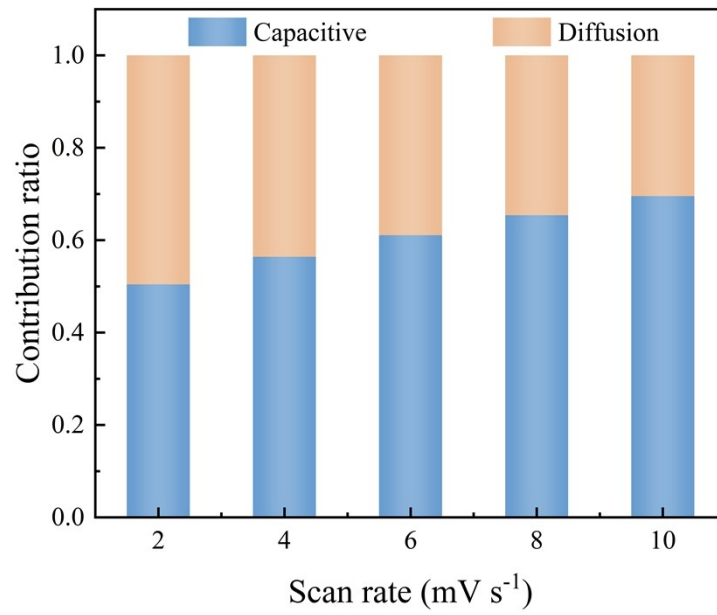

**Fig. S9** Capacitive and diffusion contributions of the film at different scan rates.

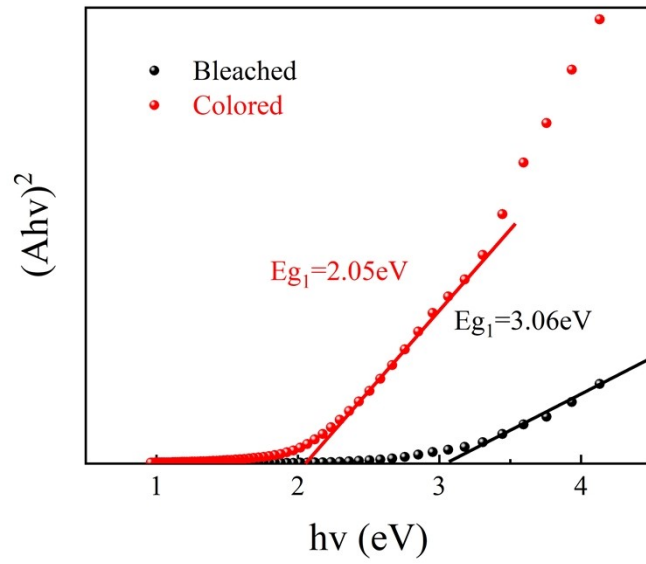

**Fig. S10** The optical band gap of NiCoO<sub>2</sub> thin film in the colored and bleached states.

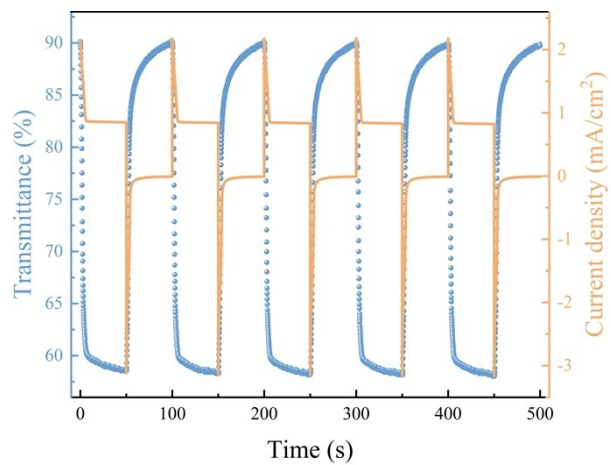

**Fig. S11** Current response and in situ transmittance response spectra of the film at 900 nm by applying square wave potentials of -0.2 and 0.6 V.

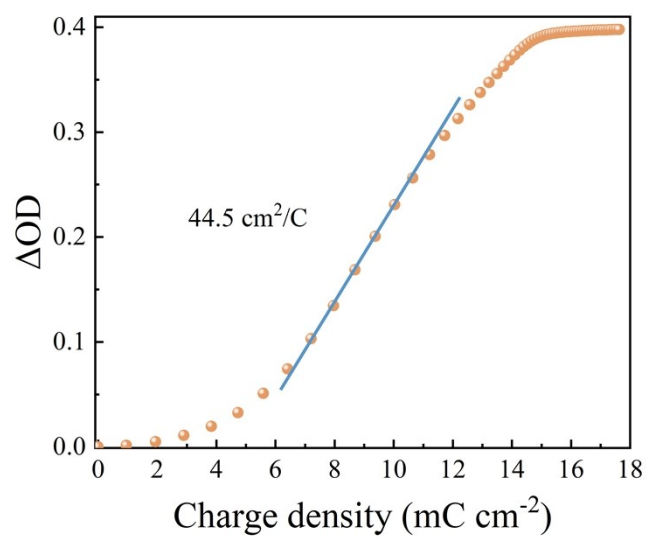

**Fig. S12** Coloration efficiency of the NiCoO<sub>2</sub> thin film in 1 M KOH electrolyte at 550 nm.

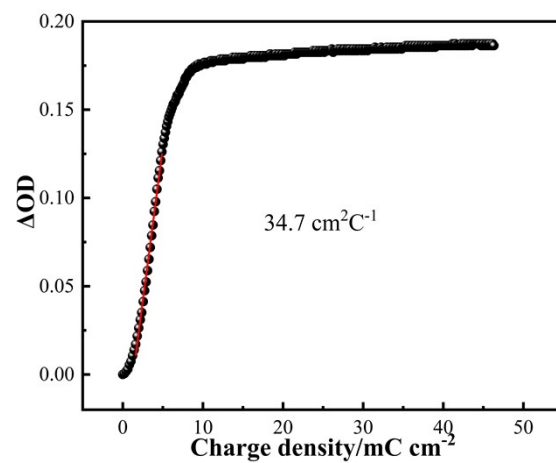

**Fig. S13** Coloring efficiency of the film at 900 nm.

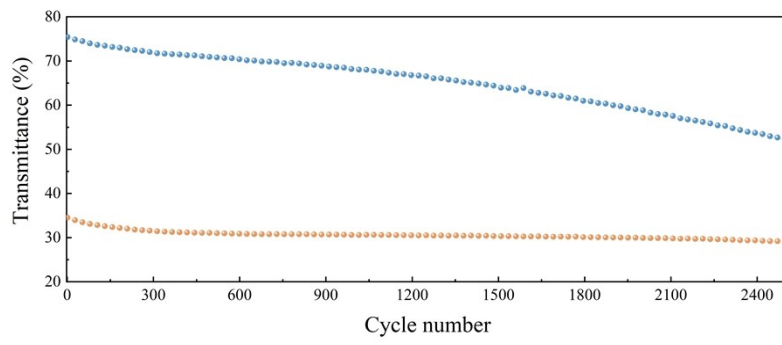

**Fig. S14** Cycling stability of NiCoO<sub>2</sub> thin films in 1M KOH electrolyte for 2500 cycles at 550 nm.

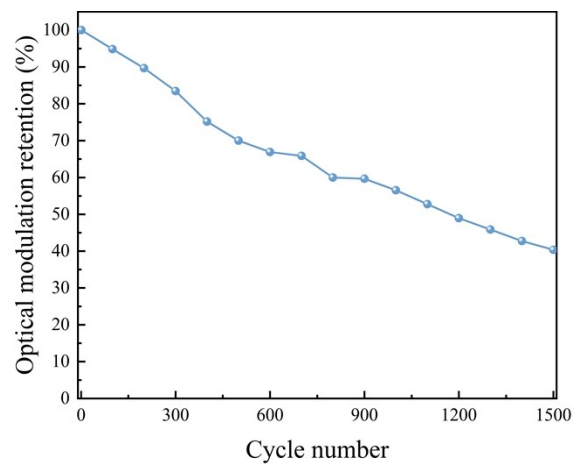

**Fig. S15** Cycling stability of the films at 900 nm for 1500 cycles.



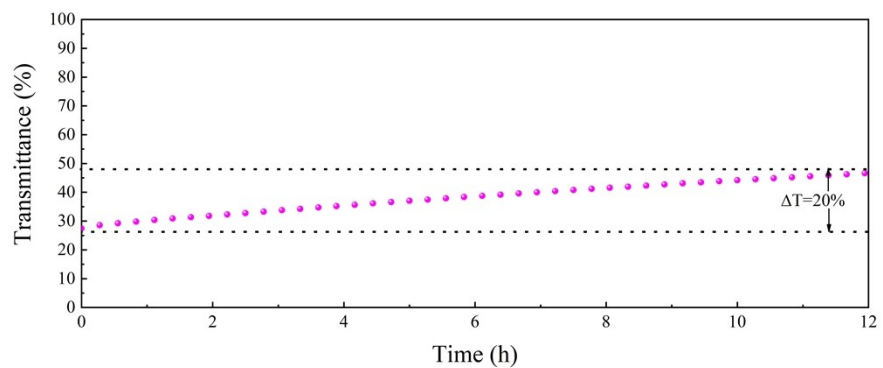

**Fig. S16** Optical memory of NiCoO<sub>2</sub> thin films in the colored state at 550 nm under open-circuit potential.

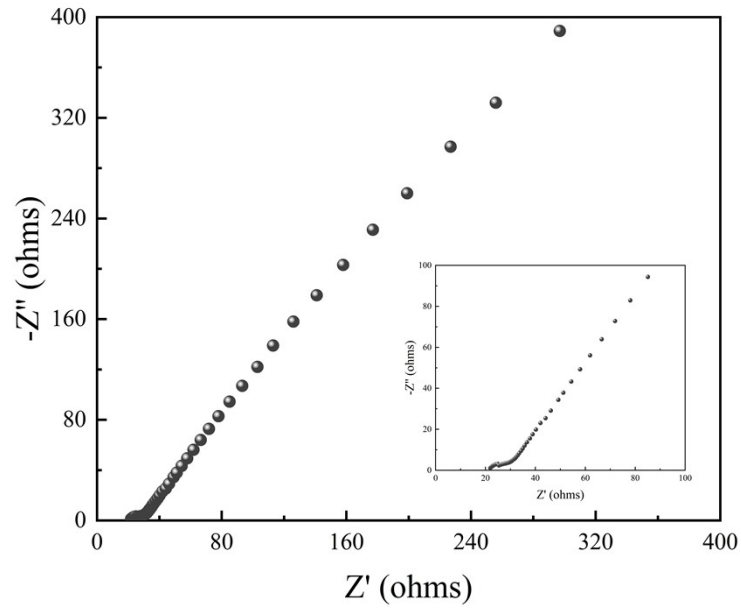

**Fig. S17** Nyquist plots of the NiCoO<sub>2</sub> film.

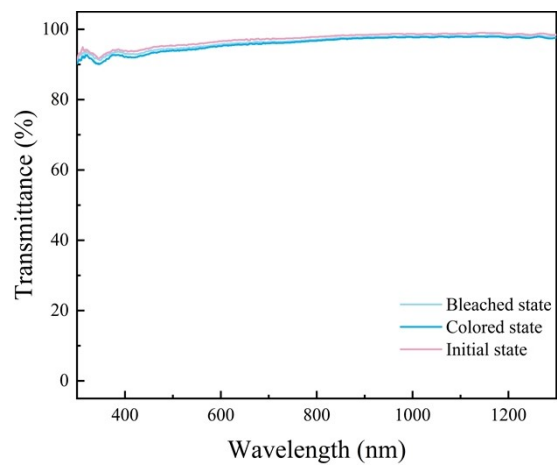

**Fig. S18** Transmittance spectra of the rGO film in the bleached state (-0.8 V vs. Ag wire) and colored state (0.6 V vs. Ag wire) .

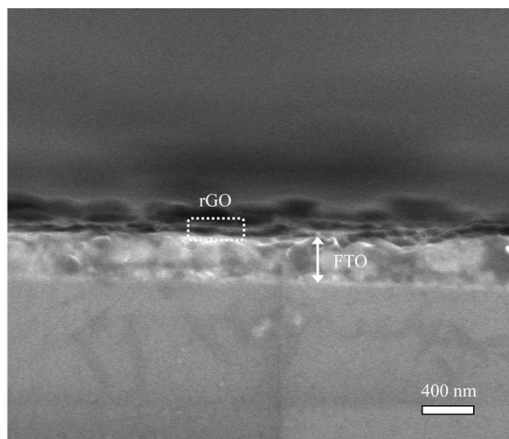

**Fig. S19** Cross-sectional image of the rGO film on the FTO substrate.

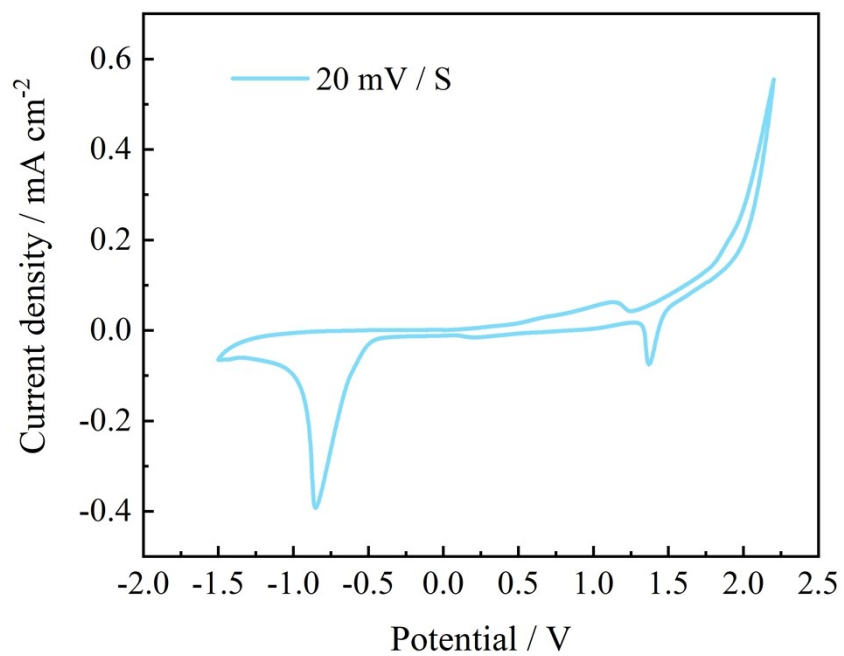

**Fig. S20** CV curve of the electrochromic energy storage device at a scan rate of 20 mV/s.

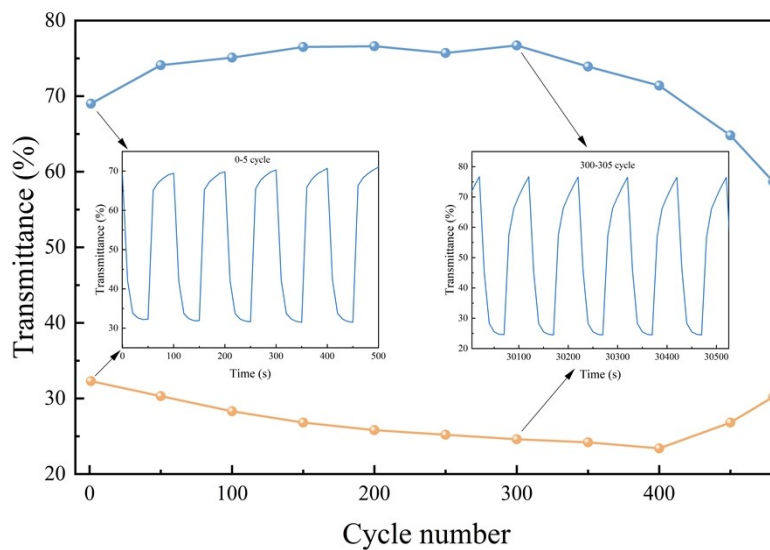

**Fig. S21** Cycling stability of the device in 1M KOH over 480 cycles.

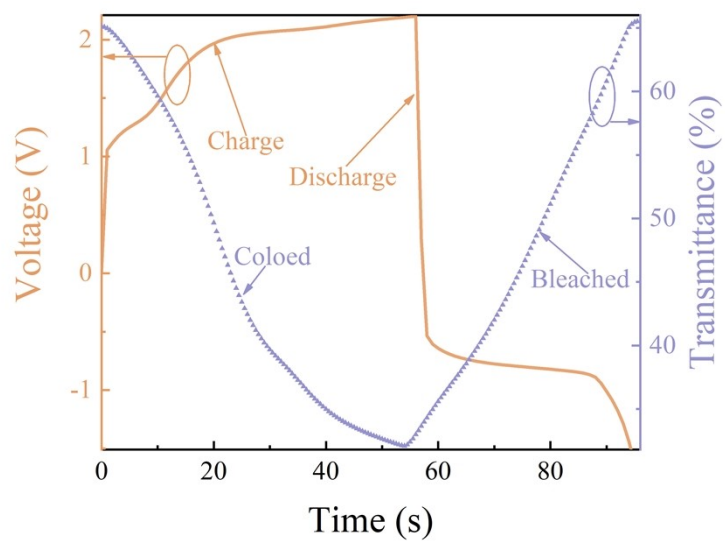

**Fig. S22** GCD curve of the electrochromic energy storage device at a current density of 0.32 mA/cm<sup>2</sup>, accompanied by in situ dynamic spectrum at 550 nm.

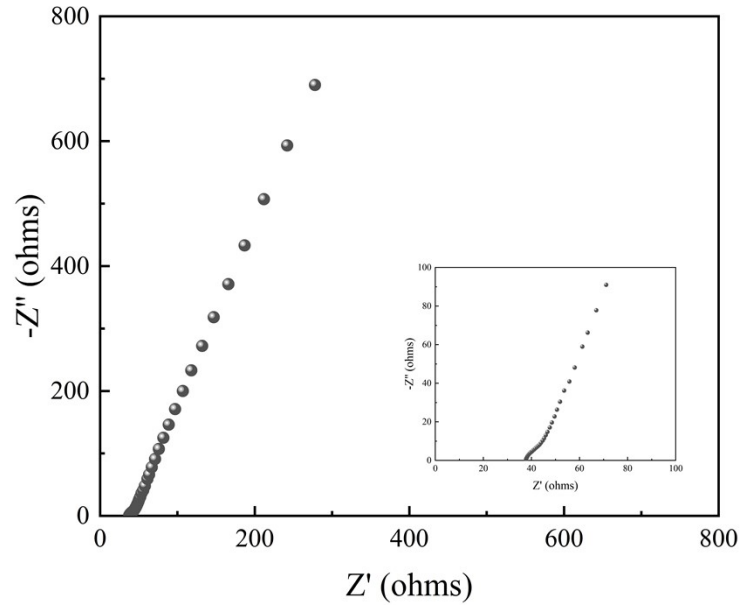

**Fig. S23** Nyquist plots of the assembled EESD.



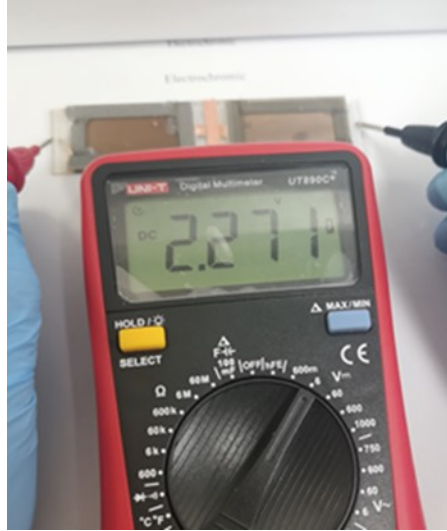

**Fig. S24** Measured voltage of two devices in series in the colored state.

**Table S1** Quantitative XPS analysis of NiCoO<sub>2</sub> thin films.

| Name  | Position | Area     | FWHM | %At Conc |
|-------|----------|----------|------|----------|
| Ni 2p | 851.00   | 56988.85 | 4.35 | 10.41    |
| Co 2p | 776.00   | 54765.59 | 6.01 | 11.27    |
| C 1s  | 280.00   | 13429.41 | 3.60 | 35.69    |
| O 1s  | 526.00   | 45011.66 | 3.79 | 42.63    |

**Table S2** The fitting parameters of NiCoO<sub>2</sub> thin films.

| Name          | Ni <sup>2+</sup> |        | Ni <sup>3+</sup> |        | Ni <sub>sat.1</sub> | Ni <sub>sat.2</sub> | Ni <sub>sat.3</sub> | Ni <sub>sat.4</sub> | Co <sup>2+</sup> |       | Co <sup>3+</sup> |       | Co <sub>sat.1</sub> | Co <sub>sat.2</sub> |
|---------------|------------------|--------|------------------|--------|---------------------|---------------------|---------------------|---------------------|------------------|-------|------------------|-------|---------------------|---------------------|
|               | 2p1/2            | 2p3/2  | 2p1/2            | 2p3/2  |                     |                     |                     |                     | 2p1/2            | 2p3/2 | 2p1/2            | 2p3/2 |                     |                     |
| Position (eV) | 867.8            | 849.9  | 869.3            | 851.6  | 856.9               | 874.8               | 861.2               | 878.0               | 797.0            | 781.2 | 795.3            | 779.6 | 784.5               | 802.1               |
| Area          | 75764            | 151529 | 216170           | 432340 | 475261              | 290519              | 41584               | 40084               | 5262             | 9315  | 6247             | 10112 | 35920               | 16270               |
| FWHM          | 2.1              | 1.5    | 3.2              | 2.6    | 4.5                 | 5.4                 | 3.3                 | 3.9                 | 2.5              | 2.6   | 2.3              | 2.0   | 9.8                 | 7.1                 |

**Table S3** Quantitative analysis of NiCoO<sub>2</sub> thin films by elemental mapping.

| Element | Ray type      | Apparent concentration | K ratio | wt%  | wt% Sigma | Atomic percentage |
|---------|---------------|------------------------|---------|------|-----------|-------------------|
| O       | K-line system | 2.03                   | 0.00683 | 3.41 | 0.07      | 67.64             |
| Si      | K-line system | 0.53                   | 0.00418 | 0.59 | 0.01      | 6.69              |
| Co      | K-line system | 0.30                   | 0.00303 | 0.32 | 0.03      | 1.71              |
| Ni      | K-line system | 0.34                   | 0.00335 | 0.34 | 0.03      | 1.81              |
| Sn      | K-line system | 7.30                   | 0.07302 | 8.28 | 0.07      | 22.14             |

**Table S4** The property comparison of the NiCoO<sub>2</sub> electrode with other reported works

| Ref.               | Materials                                | Optical modulation                | Memory properties | Cyclic stability         | Areal capacitance                                                      |
|--------------------|------------------------------------------|-----------------------------------|-------------------|--------------------------|------------------------------------------------------------------------|
| This work          | NiCoO <sub>2</sub>                       | 54.7% (550 nm)<br>34.8% (900 nm)  | 12 h (20%)        | 1500 (85%)<br>2500 (60%) | 3.16 $\mu$ Ah/cm <sup>2</sup><br>(0.02 mA/cm <sup>2</sup> )            |
| Ref. <sup>2</sup>  | NiO                                      | 37.8% (550 nm)                    | 24 h (36%)        | 1000 (91%)               | 5.72 $\times 10^{-2}$ mAh/cm <sup>2</sup><br>(0.1 mA/cm <sup>2</sup> ) |
| Ref. <sup>3</sup>  | NiCoO <sub>2</sub>                       | 64.2% (550 nm)<br>41.8% (1000 nm) | 6.7 h (11.4%)     | 500 (75%)                | 33.6 mAh/g<br>(0.25A/g)                                                |
| Ref. <sup>1</sup>  | NiO                                      | 30.0% (550 nm)                    | -                 | -                        | -                                                                      |
| Ref. <sup>4</sup>  | NiO                                      | 41.8% (650 nm)                    | -                 | 10000 (86%)              | 2.08 F/cm <sup>2</sup><br>(1 mA/cm <sup>2</sup> )                      |
| Ref. <sup>5</sup>  | Co <sub>3</sub> O <sub>4</sub>           | 38% (633 nm)                      | -                 | -                        | -                                                                      |
| Ref. <sup>6</sup>  | Co <sub>3</sub> O <sub>4</sub>           | 13.9% (550 nm)                    | -                 | 5 (100%)                 | 99.67 F/g<br>(0.5 A/g)                                                 |
| Ref. <sup>7</sup>  | NiCoO <sub>2</sub>                       | 60% (550 nm)                      | 0.8 h (32.6%)     | 1000 (62%)               | 194.5 mAh/cm <sup>2</sup><br>(0.04 mA/cm <sup>2</sup> )                |
| Ref. <sup>8</sup>  | Co <sub>3</sub> O <sub>4</sub> /NiO      | 65.2% (600 nm)                    | -                 | 300 (<90%)               | -                                                                      |
| Ref. <sup>9</sup>  | Co(OH) <sub>2</sub> /Ni(OH) <sub>2</sub> | ~20% (900 nm)                     | 600 s (1%)        | 4000 (75%)               | 14.66 mF/cm <sup>2</sup><br>(0.2 mA/cm <sup>2</sup> )                  |
| Ref. <sup>10</sup> | Ni <sub>8</sub> -Co <sub>2</sub> oxide   | 49% (600 nm)                      | 3000 s (10%)      | 1000 (49%)               | -                                                                      |
| Ref. <sup>11</sup> | Ni-Co oxide                              | 55% (800 nm)                      | 3000 s (<5%)      | 1000 (100%)              | -                                                                      |

- Dong, D.; Djaoued, H.; Vienneau, G.; Robichaud, J.; Brown, D.; Brüning, R.; Djaoued, Y., Electrochromic and colorimetric properties of anodic NiO thin films: Uncovering electrochromic mechanism of NiO. *Electrochimica Acta* **2020**, *335*, 135648.
- Gao, Y.; Lei, P.; Zhang, S.; Liu, H.; Hu, C.; Kou, Z.; Wang, J.; Cai, G., A layer-stacked NiO nanowire/nanosheet homostructure for electrochromic smart windows with ultra-large optical modulation. *Nanoscale* **2023**, *15* (19), 8685-8692.
- Lei, P.; Wang, J.; Zhang, P.; Liu, S.; Zhang, S.; Gao, Y.; Tu, J.; Cai, G., Growth of a porous NiCoO<sub>2</sub> nanowire network for transparent-to-brownish grey electrochromic smart windows with wide-band optical modulation. *Journal of Materials Chemistry C* **2021**.
- Zhou, S.; Wang, S.; Zhou, S.; Xu, H.; Zhao, J.; Wang, J.; Li, Y., An electrochromic supercapacitor based on a MOF derived hierarchical-porous NiO film. *Nanoscale* **2020**, *12* (16), 8934-8941.
- Ravi Dhas, C.; Venkatesh, R.; Sivakumar, R.; Dhandayuthapani, T.; Subramanian, B.; Sanjeeviraja, C.; Moses Ezhil Raj, A., Electrochromic performance of chromium-doped Co<sub>3</sub>O<sub>4</sub> nanocrystalline thin films prepared by nebulizer spray technique. *J Alloy Compd* **2019**, *784*, 49-59.
- He, Y.; Tao, X.; Li, Z.; Gao, G.; Zhuang, J.; He, L.; Li, Y.; Wang, Y.; Sun, D.; Xie, A., The Mg-Co<sub>3</sub>O<sub>4</sub> coating on indium tin oxide film with improved electrochromic and energy storage properties by sol-gel spin coating. *Ceramics International* **2023**, *49* (19), 32237-32245.
- Kou, Z.; Wang, J.; Tong, X.; Lei, P.; Gao, Y.; Zhang, S.; Cui, X.; Wu, S.; Cai, G., Multi-functional electrochromic energy storage smart window powered by CZTSSe solar cell for intelligent managing solar radiation of building. *Solar Energy Materials and Solar Cells* **2023**, *254*.
- Zhao, H.; Meng, Y.; Yu, H.; Li, Z.; Liu, Z., 1D/2D Co<sub>3</sub>O<sub>4</sub>/NiO composite film for high electrochromic performance. *Ceramics International* **2022**, *48* (21), 32205-32212.
- Lee, Y.-H.; Kang, J. S.; Park, J.-H.; Kang, J.; Jo, I.-R.; Sung, Y.-E.; Ahn, K.-S., Color-switchable electrochromic Co(OH)<sub>2</sub>/Ni(OH)<sub>2</sub> nanofilms with ultrafast kinetics for multifunctional smart windows. *Nano Energy* **2020**, *72*, 104720.
- Kim, K. H.; Morohoshi, M.; Abe, Y., Color modulation of electrochromic nanosheet-structured nickel-cobalt oxide thin films. *Applied Physics A* **2022**, *128* (6), 507.

11. Kim, K. H.; Numata, K.; Morohoshi, M.; Abe, Y., Morphological evolution of electrochromic nanosheet-structured nickel-cobalt oxide thin films. *Materials Letters* **2022**, *329*, 133192.
